# Supplementary material for: TSCCA: A tensor sparse CCA method for detecting microRNA-gene patterns from multiple cancers
Source: PubMed Central journal article supplement (PMC8195367; doi:10.1371/journal.pcbi.1009044), 2021-06-01

(A)

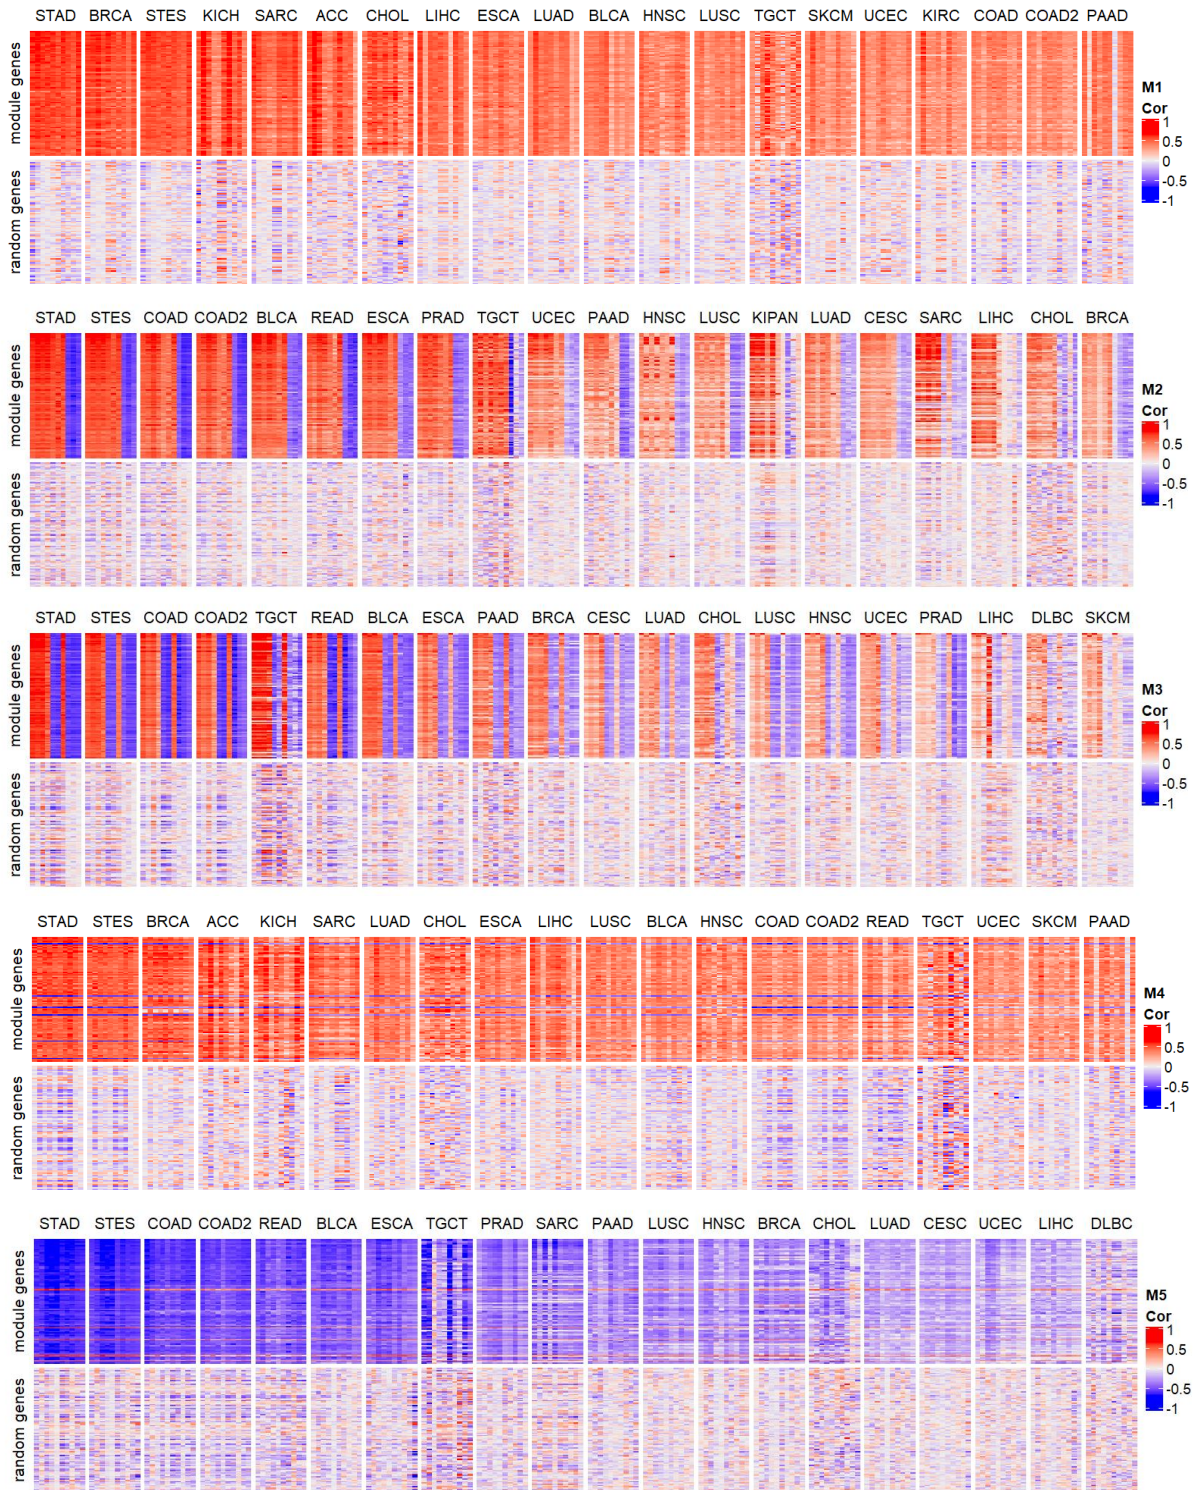



(B)

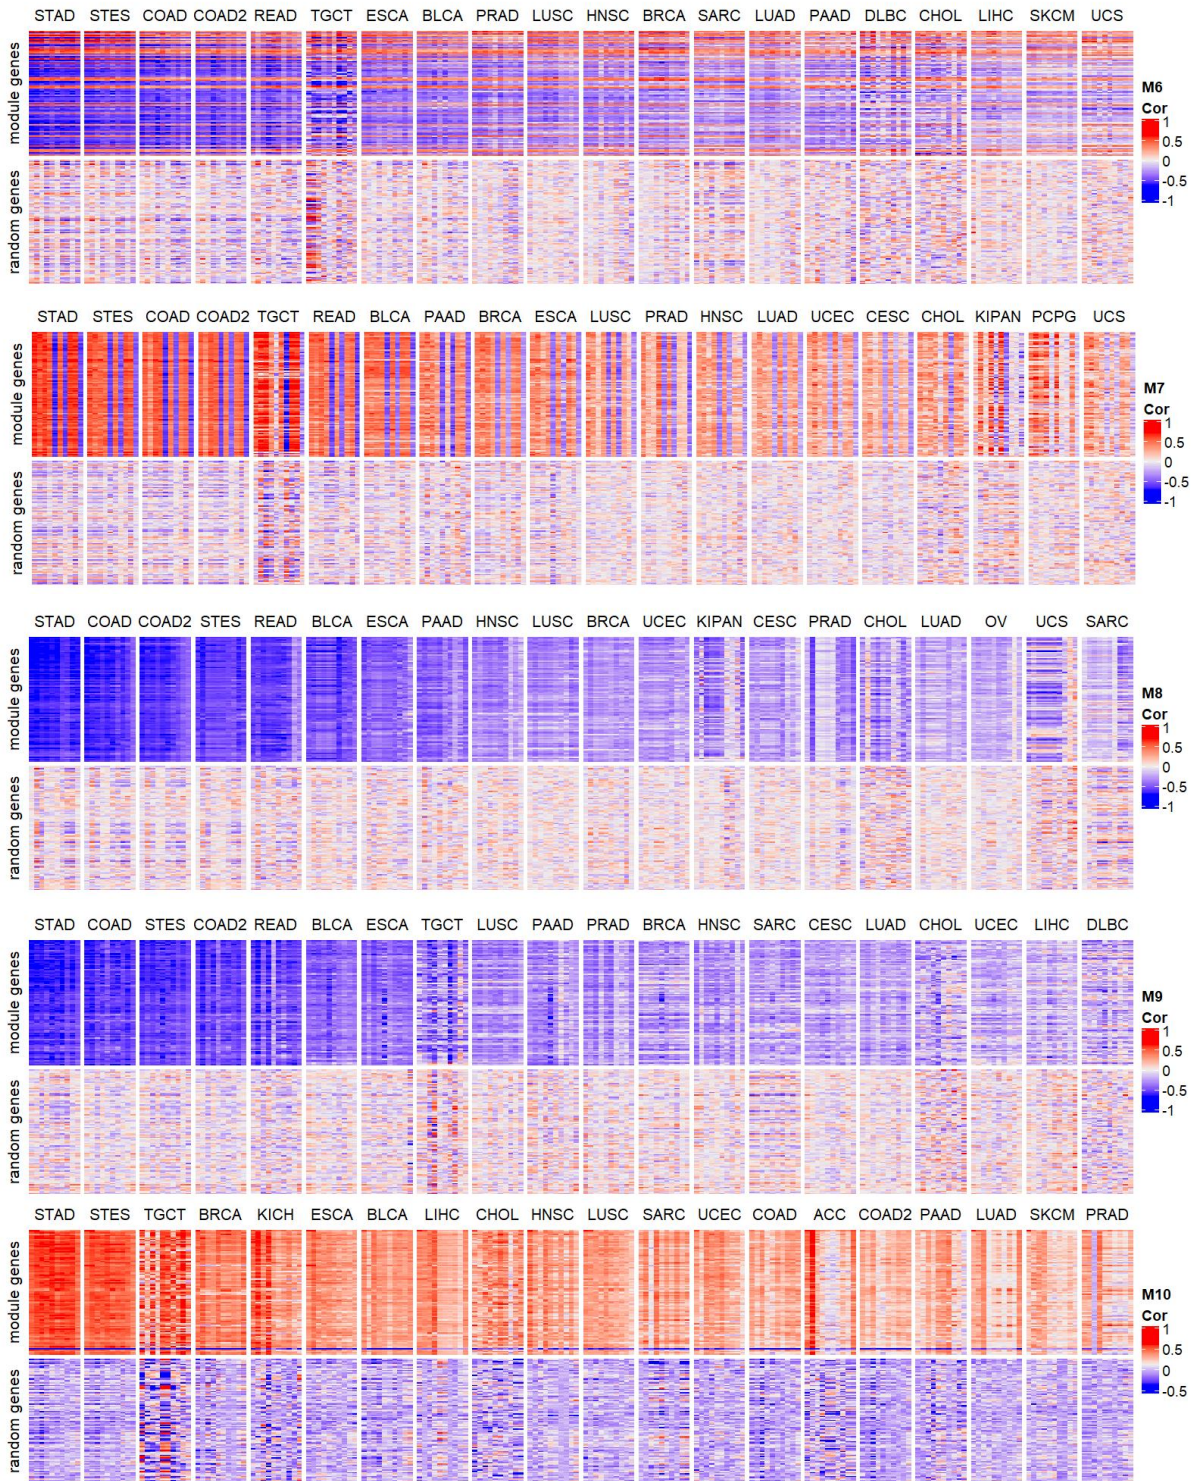



(C)

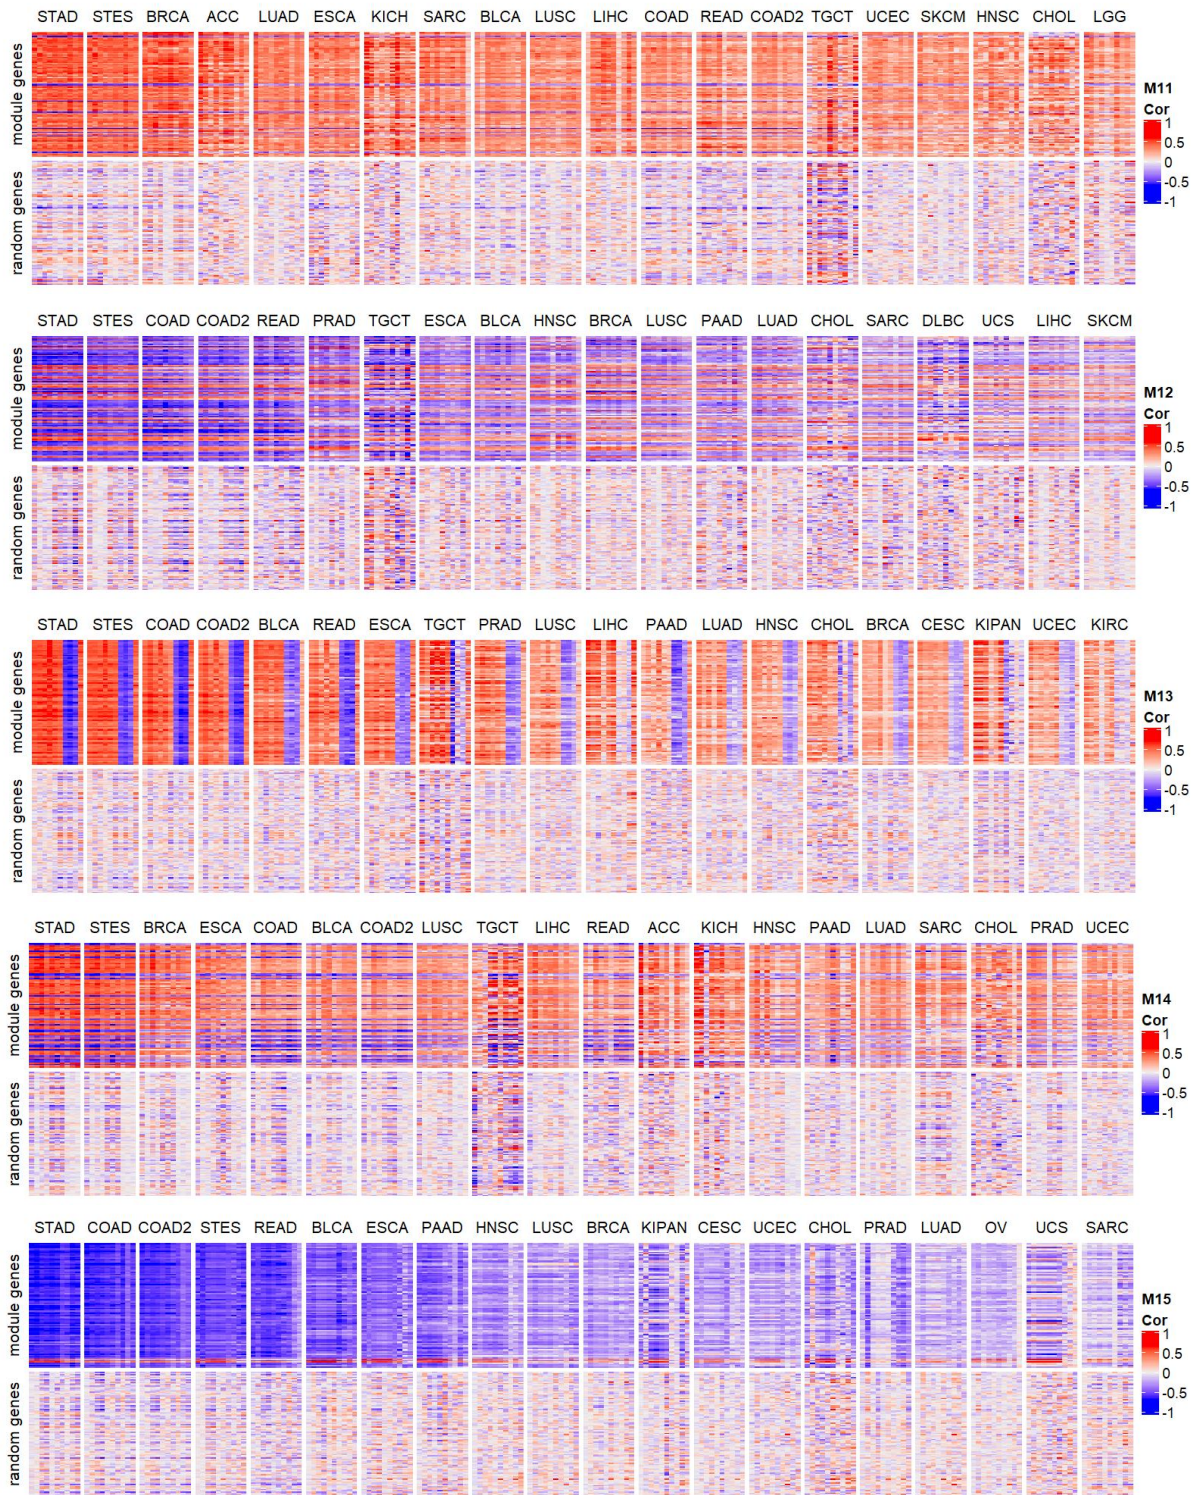



(D)

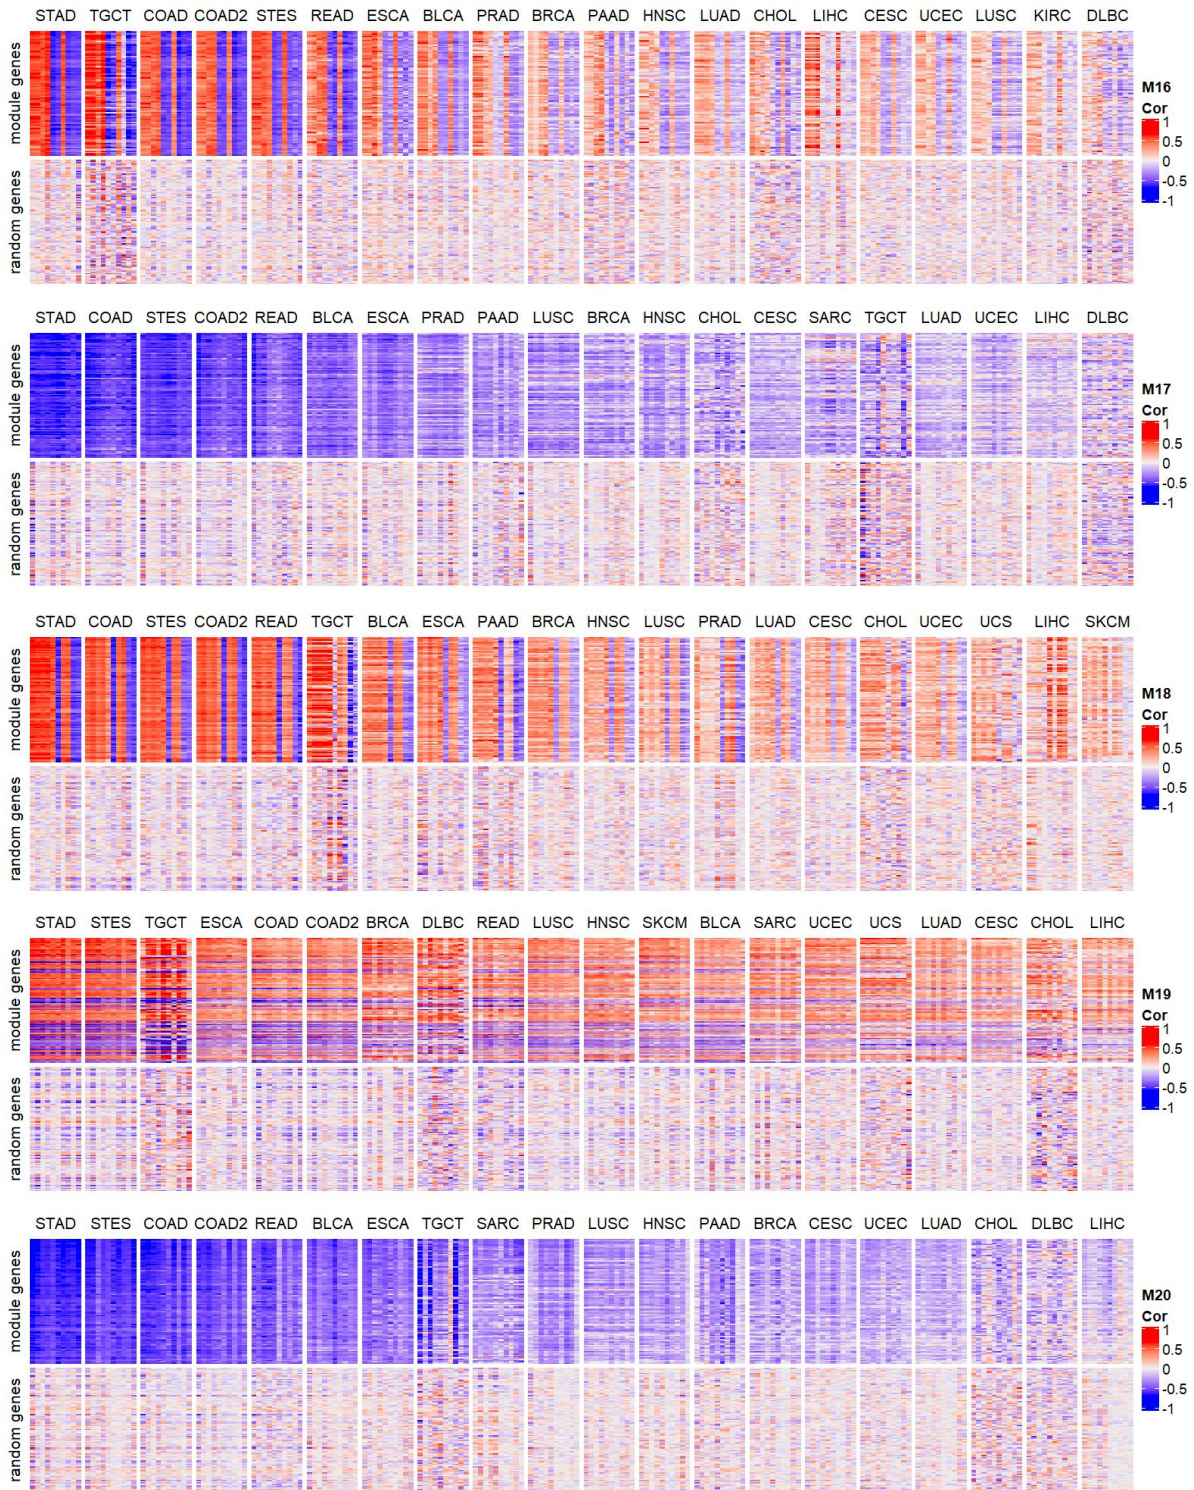



(E)

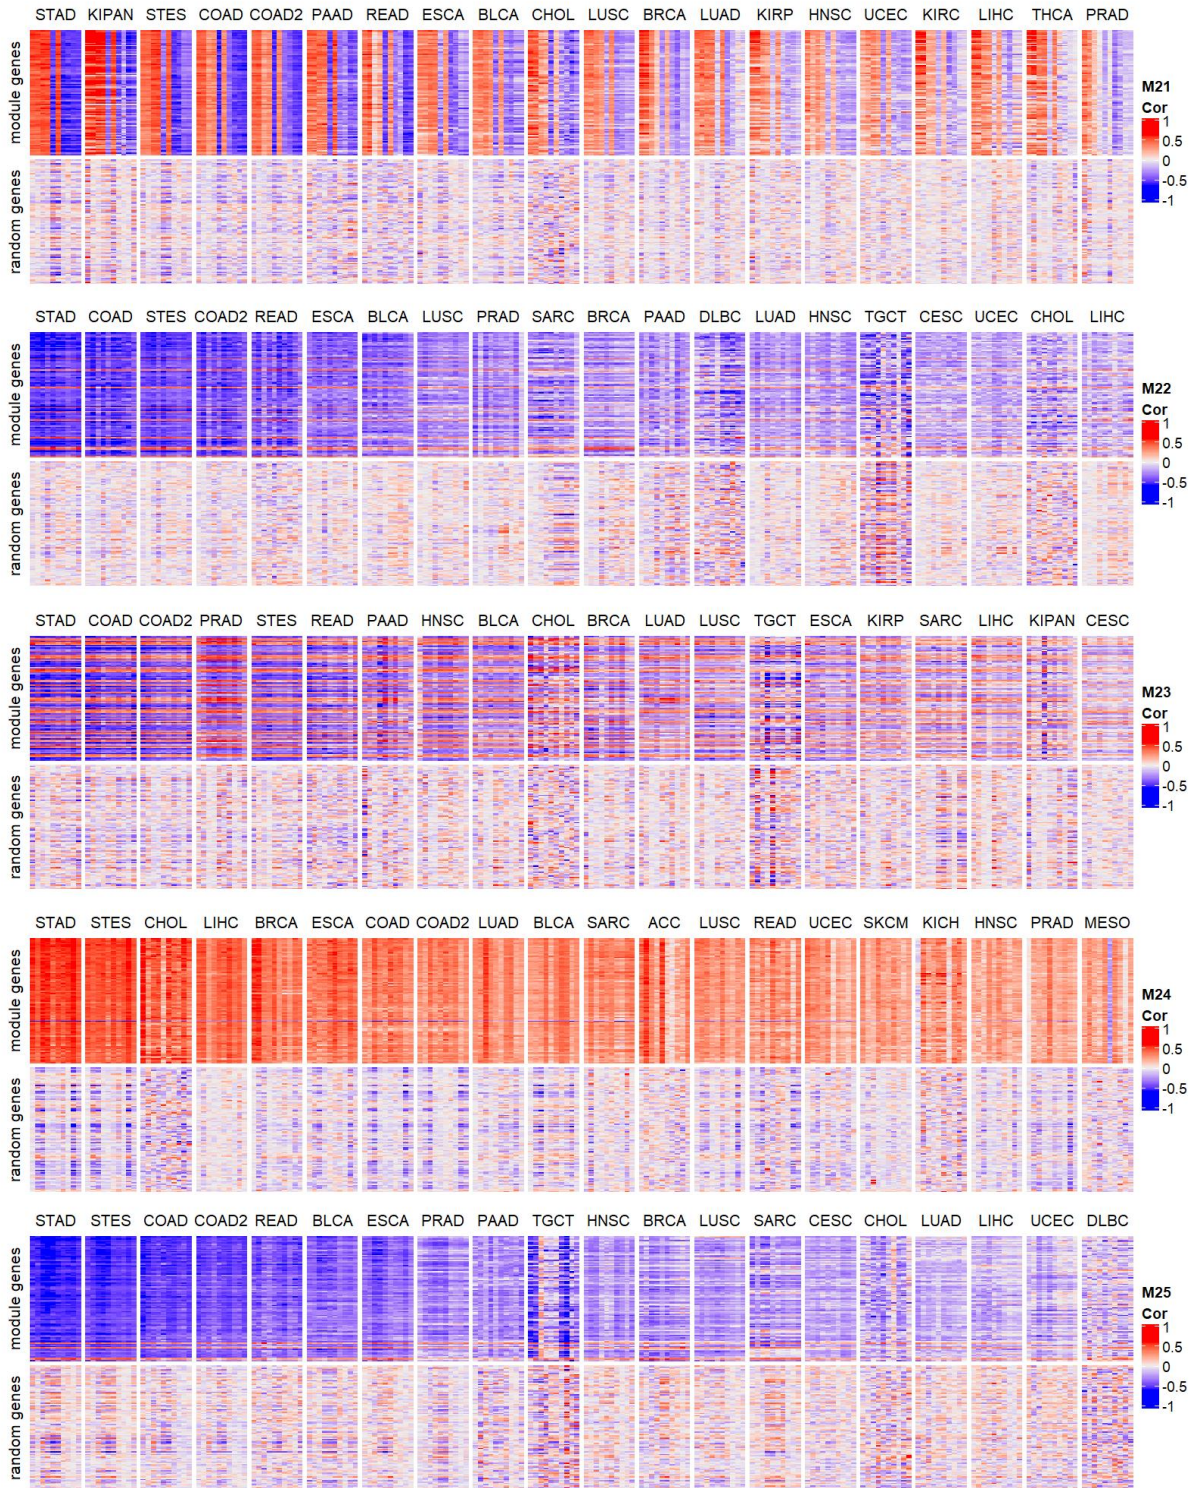



(F)

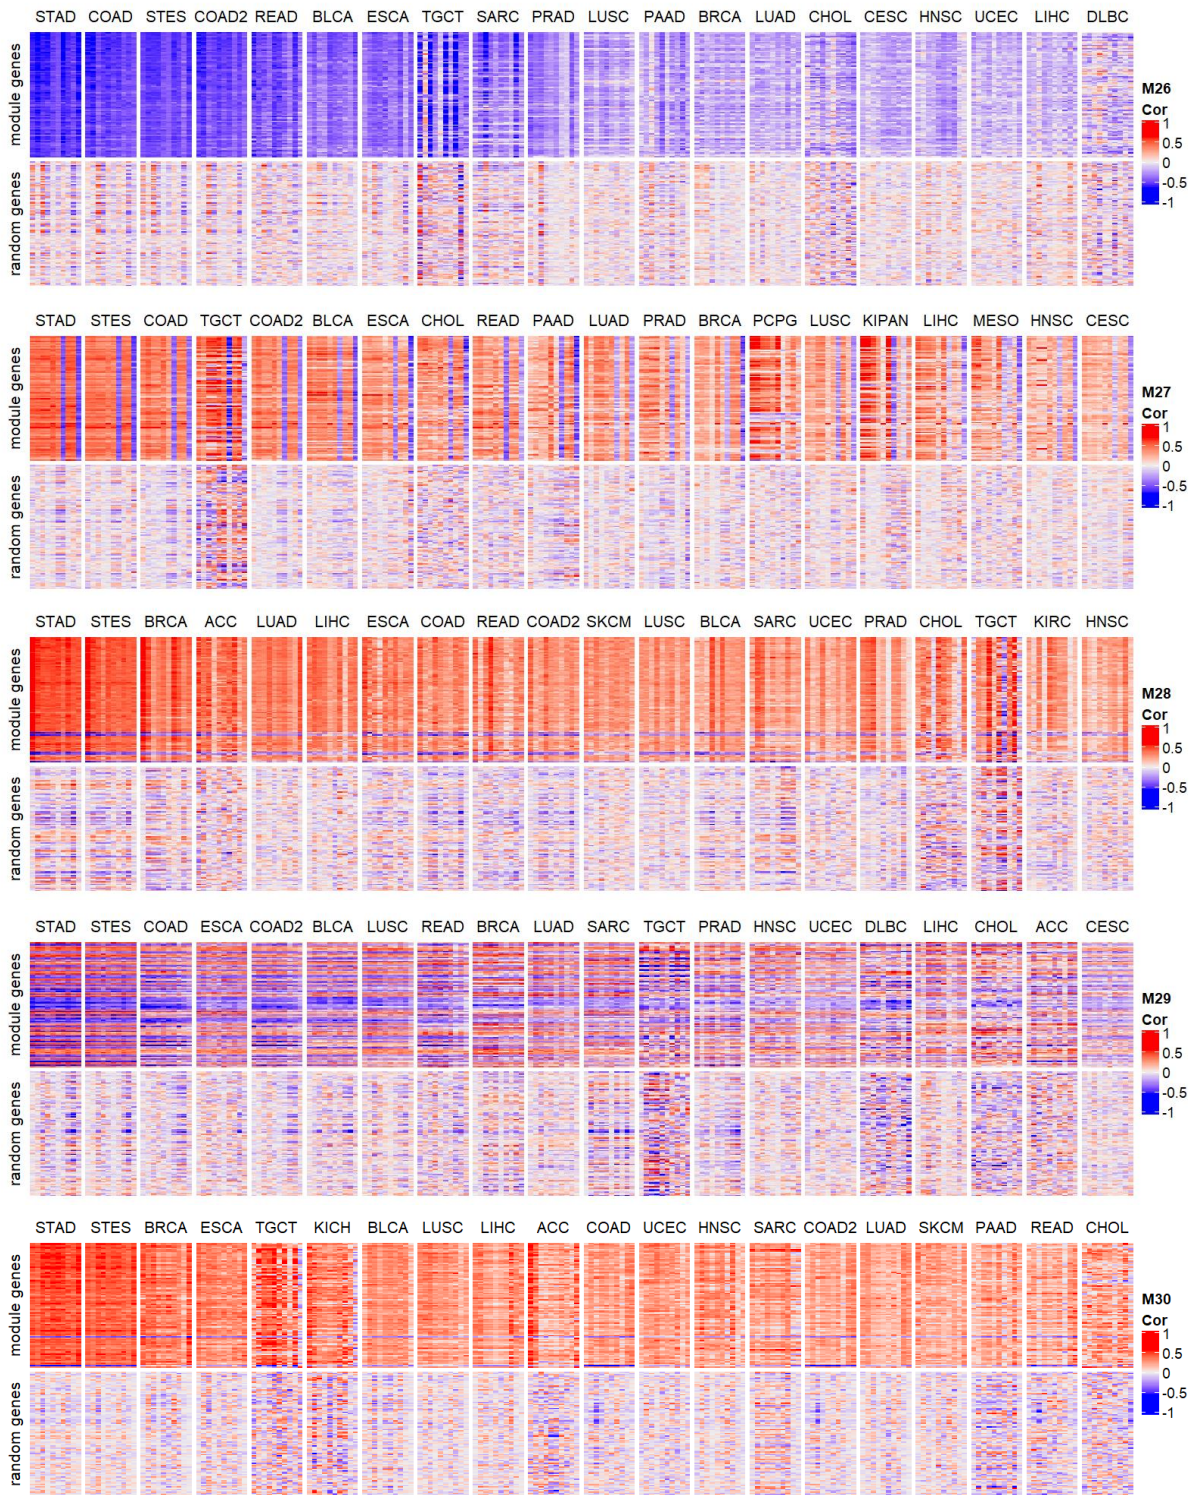



(G)

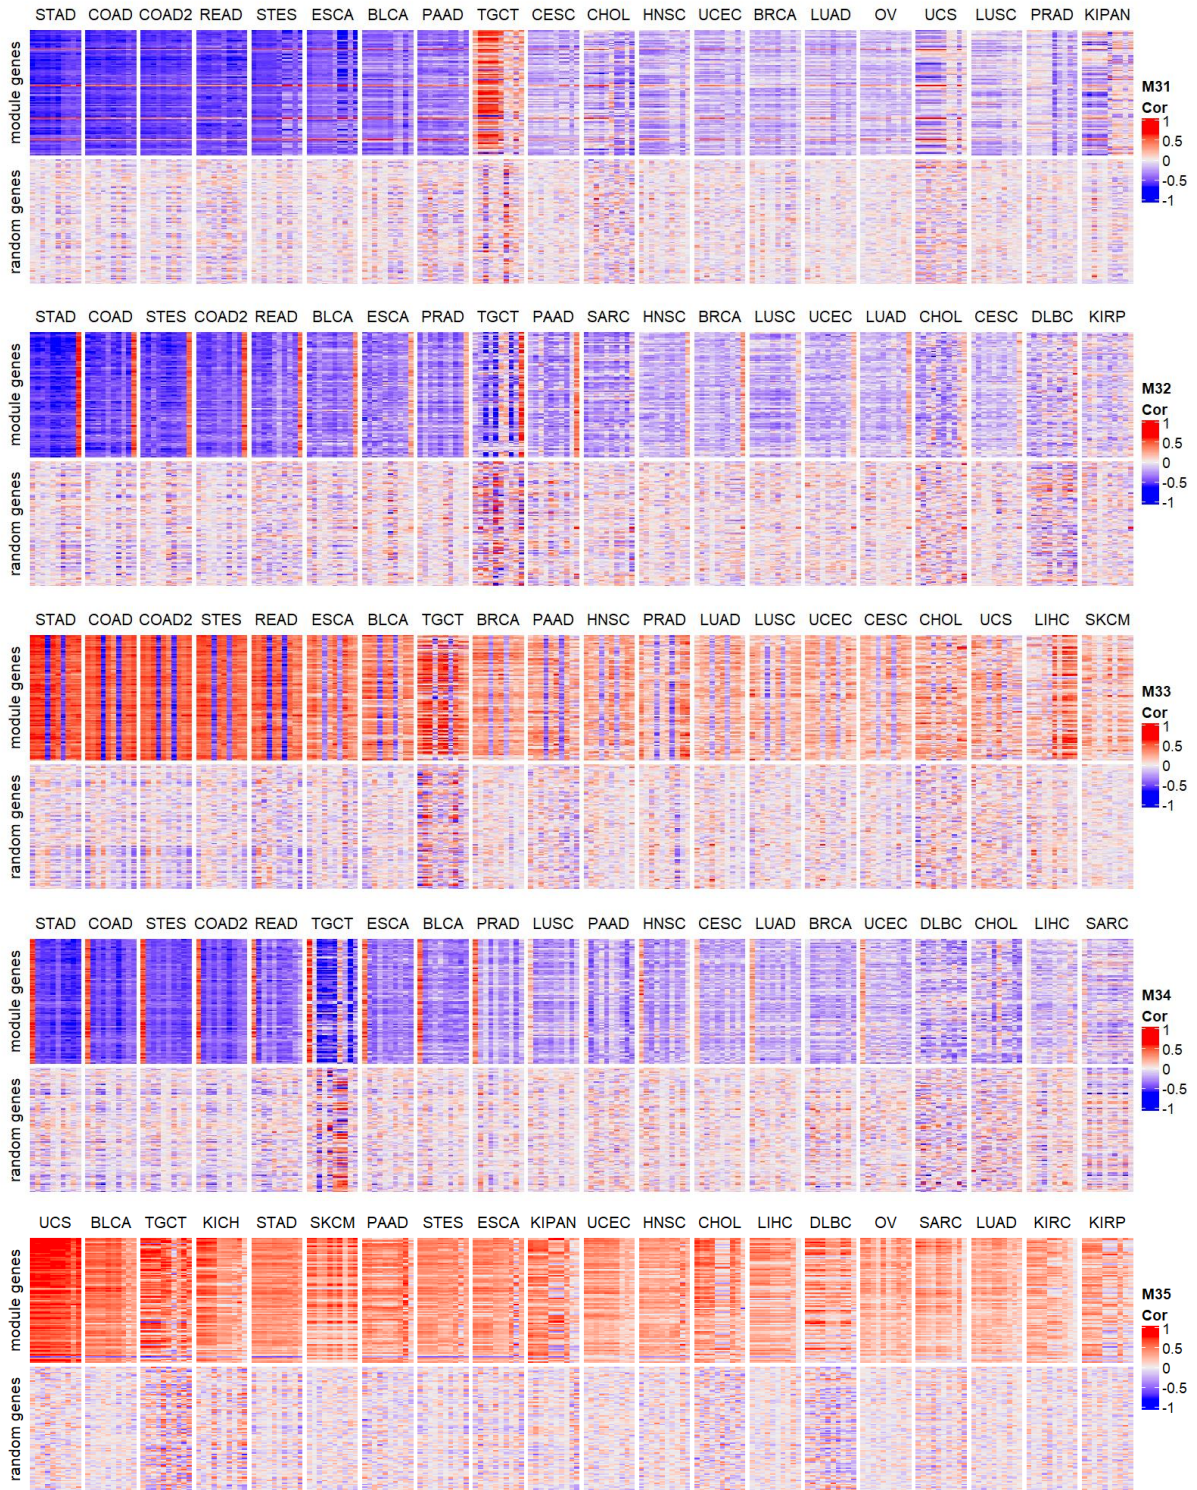



(H)

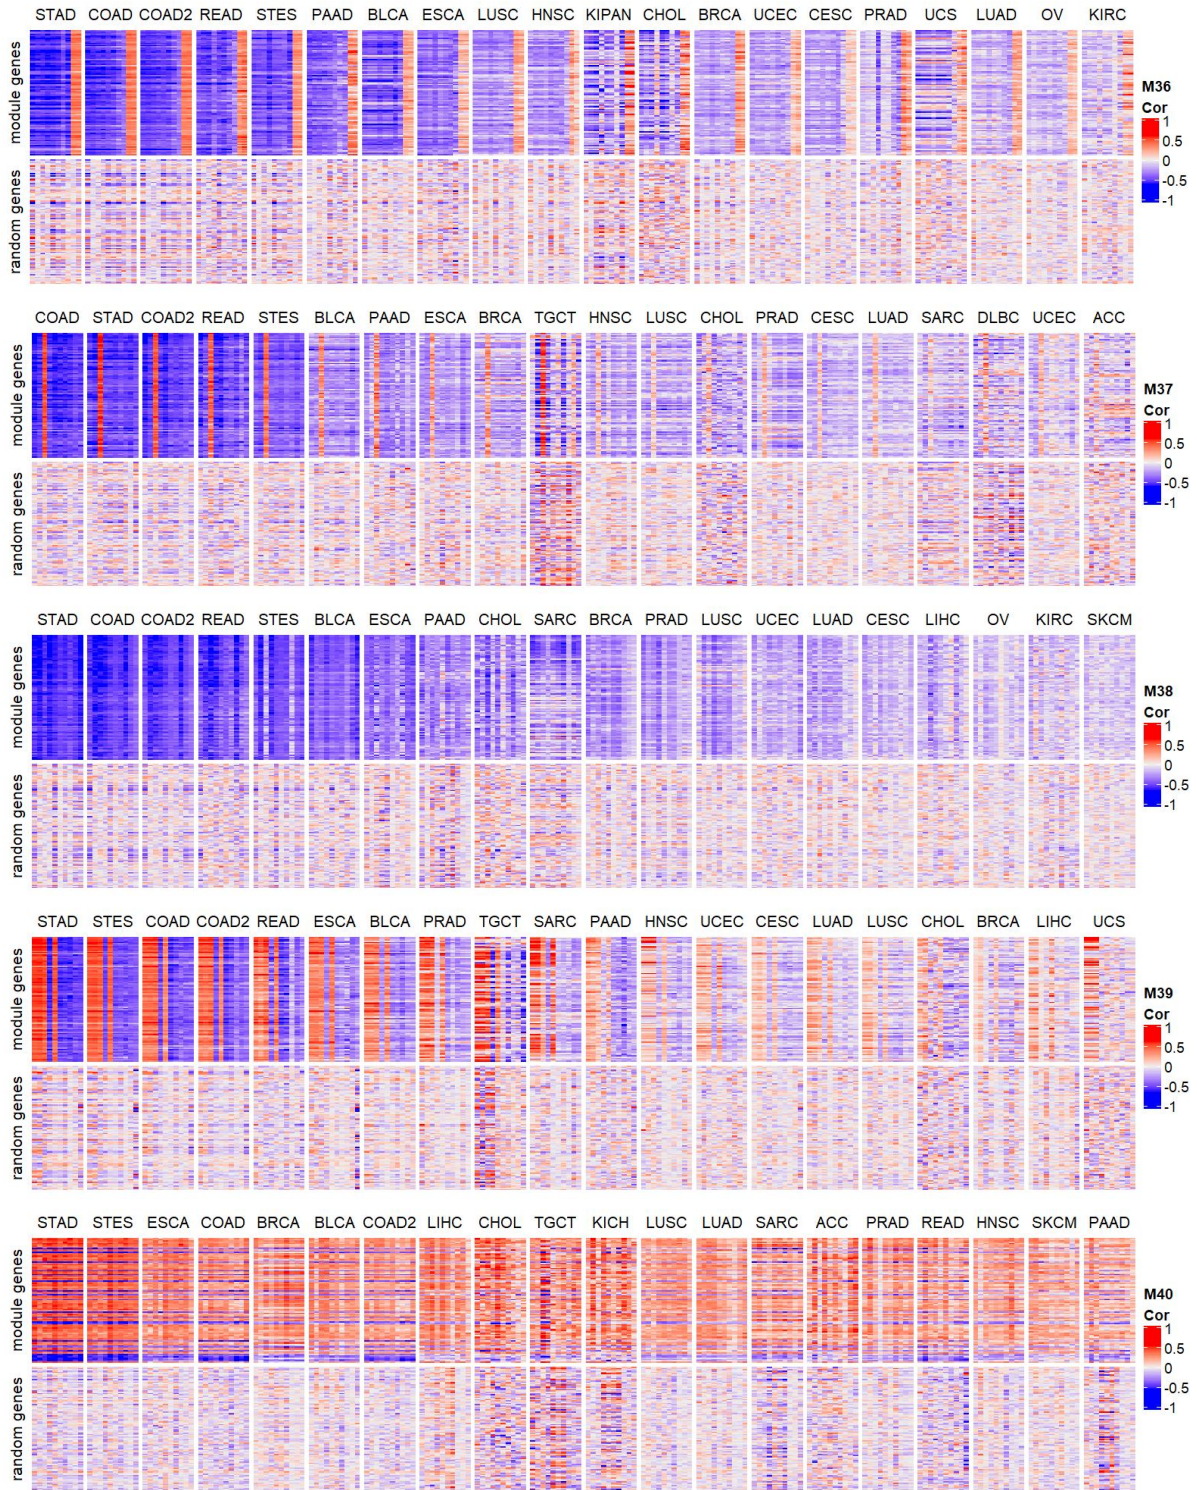



(I)

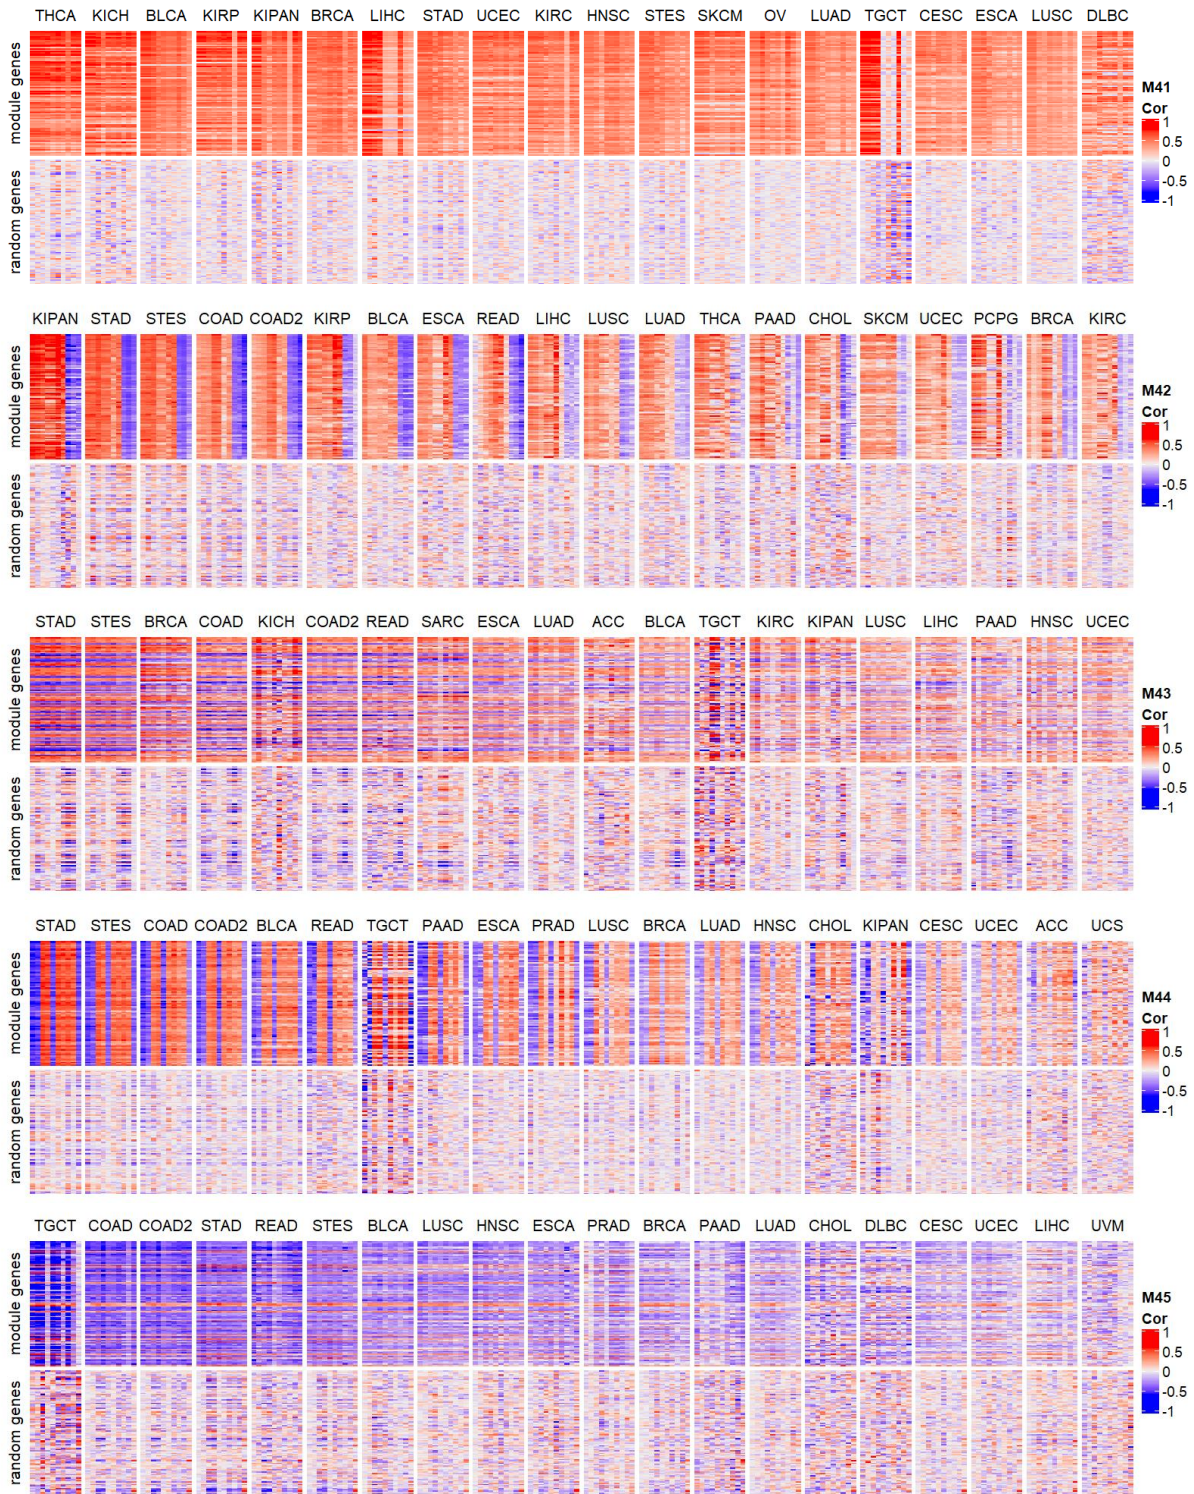



(J)

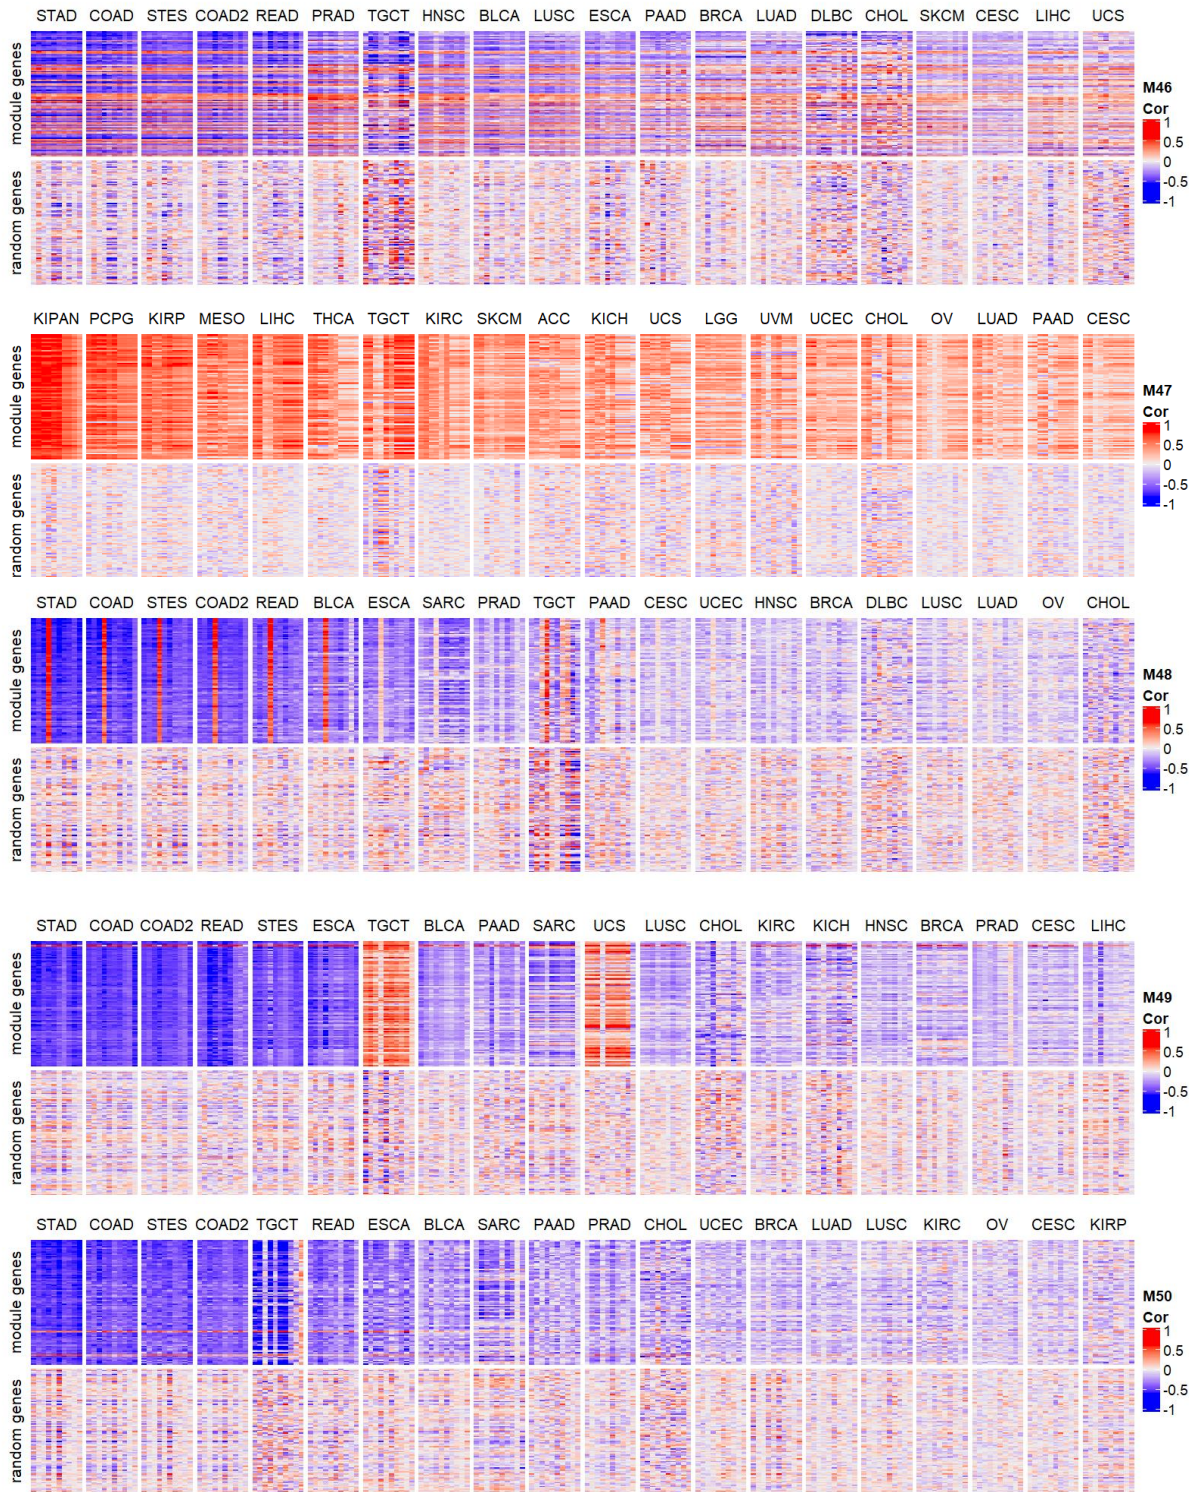

Supplement: pcbi.1009044.s003.pdf [file pcbi.1009044.s003.pdf]
