# Supplementary material for: TSCCA: A tensor sparse CCA method for detecting microRNA-gene patterns from multiple cancers
Source: PubMed Central journal article supplement (PMC8195367; doi:10.1371/journal.pcbi.1009044), 2021-06-01

**A**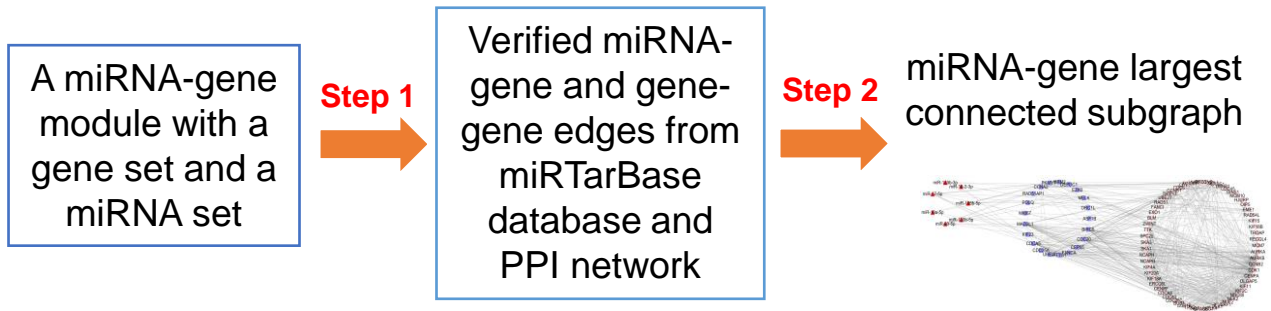**B**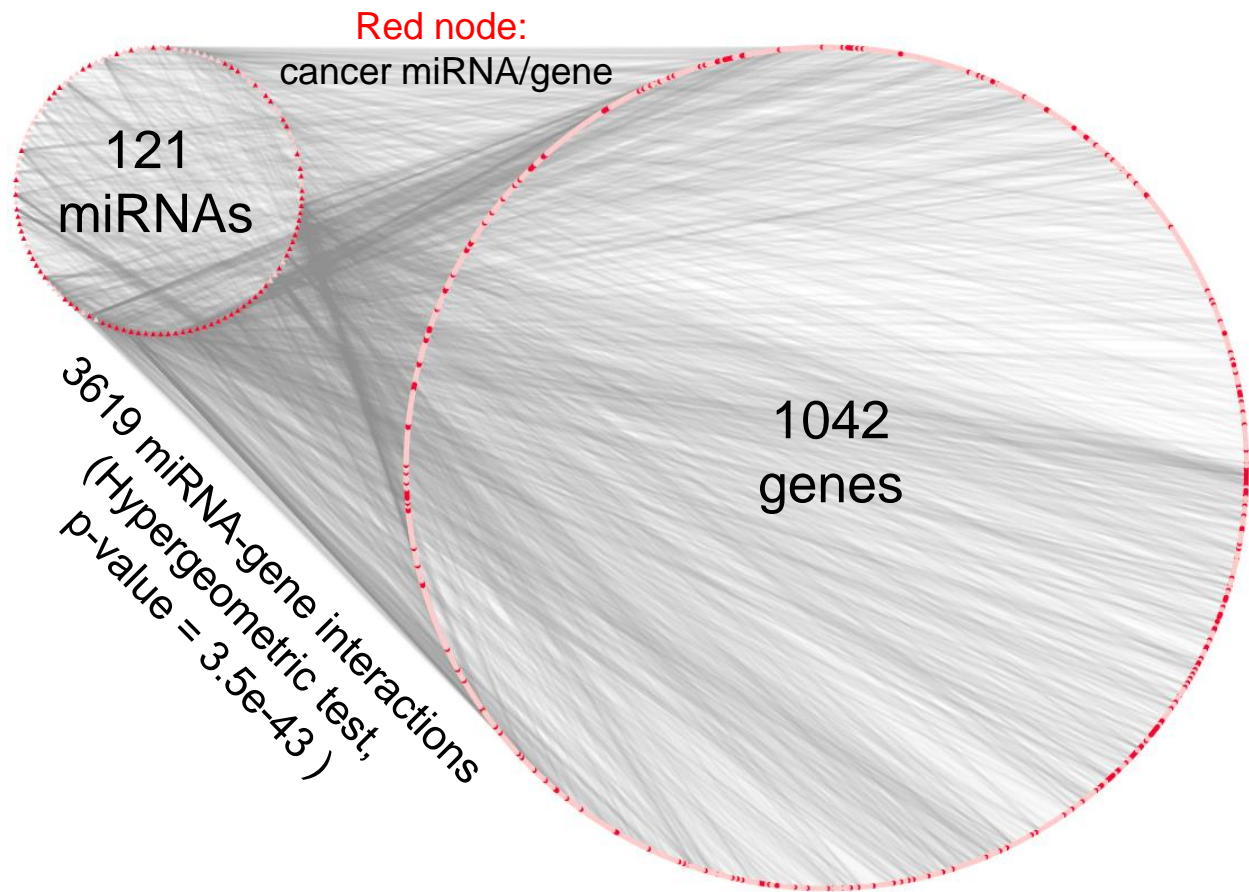

Supplement: pcbi.1009044.s006.pdf [file pcbi.1009044.s006.pdf]
