# Supplementary material for: TSCCA: A tensor sparse CCA method for detecting microRNA-gene patterns from multiple cancers
Source: PubMed Central journal article supplement (PMC8195367; doi:10.1371/journal.pcbi.1009044), 2021-06-01

# A. Heatmap of pcModule

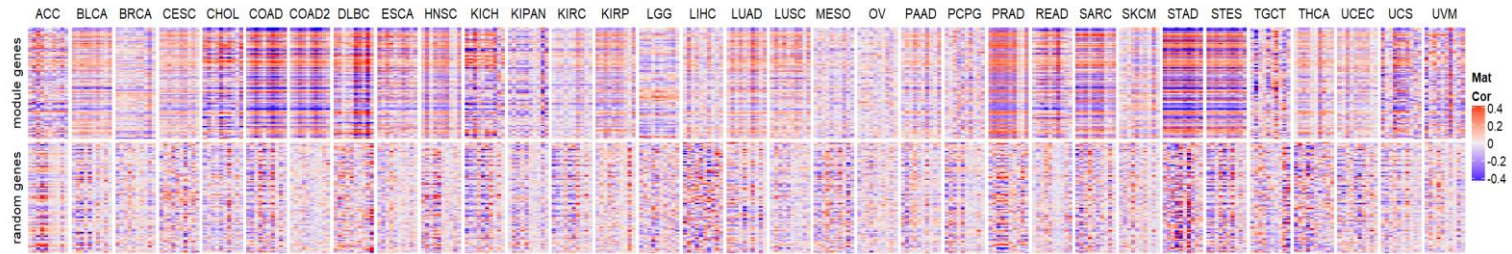

# B. Histogram

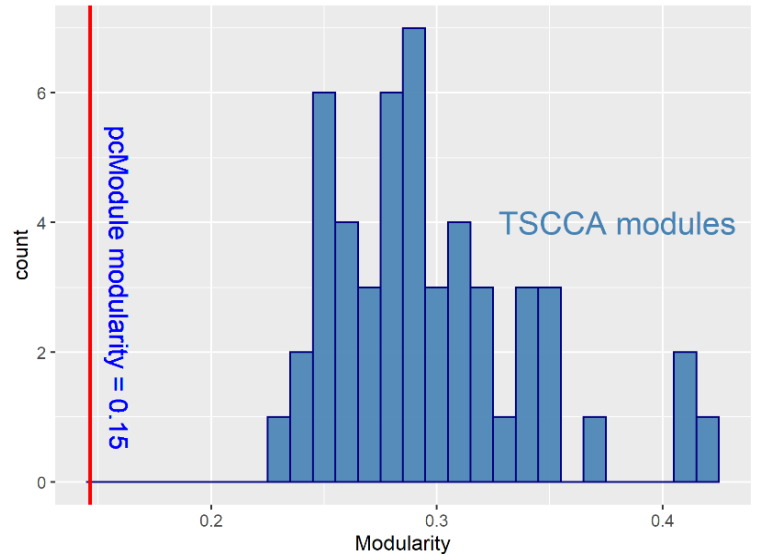

Supplement: pcbi.1009044.s009.pdf [file pcbi.1009044.s009.pdf]
